# Supplementary figures and images for: How may COVID-19 viral membrane resist when exposed radiation to treatment : effects on Phospholipids and cholesterol
Source: Research Square preprint supplement (doi:10.21203/rs.3.rs-276017/v1), 2021-03-11

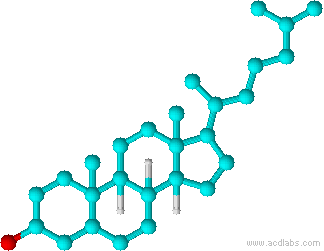

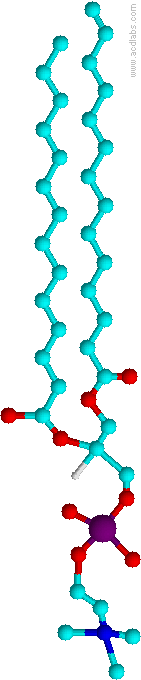


**(a)**

**(b)**

Scheme 1

Scheme 1

Supplement: Supplementary file 1 [file d2f75cd8027c08d1efd6b7c1.doc]
